# Supplementary material for: Are sweet snacks more sensitive to price increases than sugar-sweetened beverages: analysis of British food purchase data
Source: PubMed Central journal article supplement (PMC5922464; doi:10.1136/bmjopen-2017-019788), 2018-04-26
Supplement: bmjopen-2017-019788supp002.pdf [file bmjopen-2017-019788supp002.pdf]

## Appendix 2: Price elasticities

Table 1. Price elasticities of demand in full sample (n=623,459)

|                          | High-sugar soft drinks        | Medium-sugar soft drinks      | Low-sugar soft drinks         | Other soft drinks             | Alcohol                       | Biscuits & cookies            | Chocolate & conf.             | Cake-type snacks              | Savoury snacks                | Meat & fish                   | Dairy & eggs                  | Fruit & vegetables            | Rest food & drink             |
|--------------------------|-------------------------------|-------------------------------|-------------------------------|-------------------------------|-------------------------------|-------------------------------|-------------------------------|-------------------------------|-------------------------------|-------------------------------|-------------------------------|-------------------------------|-------------------------------|
| High-sugar soft drinks   | <b>-0.77</b><br>[-0.85;-0.70] | -0.03<br>[-0.06;0]            | <b>-0.11</b><br>[-0.19;-0.02] | -0.05<br>[-0.11;0.02]         | <b>-0.19</b><br>[-0.24;-0.14] | 0.02<br>[-0.07;0.10]          | <b>-0.06</b><br>[-0.09;-0.04] | -0.02<br>[-0.11;0.06]         | <b>0.22</b><br>[0.11;0.35]    | <b>-0.29</b><br>[-0.41;-0.15] | <b>0.26</b><br>[0.18;0.34]    | -0.08<br>[-0.17;0.01]         | 0<br>[-0.17;0.17]             |
| Medium-sugar soft drinks | <b>-0.25</b><br>[-0.44;-0.06] | <b>-0.62</b><br>[-0.70;-0.55] | <b>-0.28</b><br>[-0.46;-0.10] | <b>-0.33</b><br>[-0.53;-0.16] | <b>-0.20</b><br>[-0.33;-0.06] | -0.19<br>[-0.44;0.03]         | <b>-0.08</b><br>[-0.16;-0.02] | -0.06<br>[-0.28;0.14]         | <b>-0.34</b><br>[-0.63;-0.07] | <b>1.10</b><br>[0.76;1.38]    | <b>-0.22</b><br>[-0.43;-0.01] | <b>0.37</b><br>[0.13;0.60]    | -0.08<br>[-0.51;0.41]         |
| Low-sugar soft drinks    | -0.01<br>[-0.06;0.05]         | <b>-0.03</b><br>[-0.05;-0.01] | <b>-0.82</b><br>[-0.89;-0.76] | <b>-0.13</b><br>[-0.17;-0.09] | <b>-0.25</b><br>[-0.29;-0.21] | -0.02<br>[-0.08;0.05]         | <b>-0.07</b><br>[-0.09;-0.05] | 0<br>[-0.05;0.06]             | -0.01<br>[-0.10;0.07]         | 0.05<br>[-0.04;0.14]          | <b>0.15</b><br>[0.09;0.21]    | <b>0.12</b><br>[0.07;0.19]    | -0.04<br>[-0.18;0.08]         |
| Other soft drinks        | <b>0.11</b><br>[0.05;0.18]    | <b>-0.05</b><br>[-0.07;-0.02] | 0<br>[-0.08;0.05]             | <b>-0.83</b><br>[-0.88;-0.77] | <b>-0.17</b><br>[-0.21;-0.12] | -0.02<br>[-0.10;0.05]         | <b>-0.08</b><br>[-0.11;-0.06] | 0.01<br>[-0.05;0.08]          | 0.06<br>[-0.04;0.17]          | <b>-0.17</b><br>[-0.27;-0.07] | <b>0.13</b><br>[0.06;0.21]    | 0.03<br>[-0.04;0.10]          | 0.01<br>[-0.14;0.14]          |
| Alcohol                  | -0.04<br>[-0.10;0.00]         | <b>-0.03</b><br>[-0.05;-0.01] | -0.02<br>[-0.08;0.03]         | <b>-0.10</b><br>[-0.14;-0.05] | <b>-0.90</b><br>[-0.94;-0.86] | <b>-0.06</b><br>[-0.13;-0.01] | <b>0.03</b><br>[0.01;0.05]    | <b>0.08</b><br>[0.03;0.14]    | <b>0.11</b><br>[0.04;0.19]    | 0.08<br>[-0.01;0.17]          | 0.02<br>[-0.03;0.08]          | <b>-0.07</b><br>[-0.14;-0.01] | <b>-0.37</b><br>[-0.47;-0.25] |
| Biscuits & cookies       | 0<br>[-0.06;0.04]             | -0.01<br>[-0.02;0.02]         | <b>0.13</b><br>[0.08;0.19]    | <b>0.05</b><br>[0.01;0.09]    | <b>0.06</b><br>[0.02;0.10]    | <b>-0.69</b><br>[-0.75;-0.64] | <b>-0.12</b><br>[-0.15;-0.09] | <b>-0.07</b><br>[-0.12;-0.02] | <b>0.13</b><br>[0.03;0.20]    | <b>-0.18</b><br>[-0.28;-0.10] | -0.04<br>[-0.11;0.01]         | 0<br>[-0.06;0.07]             | <b>-0.40</b><br>[-0.51;-0.27] |
| Chocolate & conf.        | <b>0.08</b><br>[0.02;0.15]    | 0.02<br>[-0.01;0.04]          | <b>0.16</b><br>[0.09;0.24]    | 0.01<br>[-0.04;0.07]          | <b>0.07</b><br>[0.01;0.12]    | <b>-0.17</b><br>[-0.26;-0.10] | <b>-0.74</b><br>[-0.78;-0.71] | <b>0.07</b><br>[0.01;0.13]    | <b>0.27</b><br>[0.17;0.39]    | <b>0.44</b><br>[0.30;0.54]    | <b>-0.30</b><br>[-0.38;-0.22] | <b>-0.26</b><br>[-0.35;-0.19] | <b>-0.94</b><br>[-1.10;-0.77] |
| Cake-type snacks         | -0.02<br>[-0.11;0.06]         | 0<br>[-0.03;0.03]             | <b>0.17</b><br>[0.08;0.27]    | 0.09<br>[0;0.16]              | -0.02<br>[-0.09;0.05]         | <b>-0.23</b><br>[-0.33;-0.13] | <b>-0.16</b><br>[-0.19;-0.11] | <b>-0.66</b><br>[-0.78;-0.57] | <b>0.31</b><br>[0.14;0.44]    | <b>-0.32</b><br>[-0.45;-0.14] | 0.06<br>[-0.04;0.17]          | -0.08<br>[-0.17;0.02]         | -0.08<br>[-0.17;0.02]         |
| Savoury snacks           | 0<br>[-0.05;0.04]             | 0.01<br>[0;0.03]              | 0<br>[-0.05;0.05]             | -0.04<br>[-0.07;0]            | -0.03<br>[-0.06;0]            | -0.02<br>[-0.07;0.04]         | <b>-0.03</b><br>[-0.05;-0.01] | -0.04<br>[-0.10;0.01]         | <b>-0.75</b><br>[-0.82;-0.67] | -0.03<br>[-0.12;0.05]         | 0<br>[-0.05;0.05]             | 0<br>[-0.05;0.05]             | <b>-0.23</b><br>[-0.32;-0.11] |
| Meat & fish              | 0<br>[-0.03;0.03]             | 0<br>[-0.01;0.01]             | 0.01<br>[-0.03;0.04]          | 0.01<br>[-0.01;0.04]          | 0.03<br>[0;0.05]              | <b>-0.05</b><br>[-0.09;-0.01] | 0<br>[-0.01;0.02]             | -0.02<br>[-0.05;0]            | -0.04<br>[-0.10;0.01]         | <b>-0.76</b><br>[-0.81;-0.70] | <b>-0.12</b><br>[-0.15;-0.08] | <b>-0.08</b><br>[-0.12;-0.04] | -0.02<br>[-0.08;0.06]         |
| Dairy & eggs             | <b>0.03</b><br>[0.01;0.05]    | -0.01<br>[-0.02;0]            | 0.01<br>[-0.01;0.03]          | <b>0.04</b><br>[0.02;0.06]    | 0.01<br>[-0.01;0.02]          | 0.02<br>[0;0.05]              | -0.01<br>[-0.03;0]            | -0.01<br>[-0.04;0.01]         | -0.02<br>[-0.06;0.02]         | -0.03<br>[-0.06;0.02]         | <b>-0.88</b><br>[-0.91;-0.85] | <b>-0.12</b><br>[-0.14;-0.09] | <b>-0.09</b><br>[-0.14;-0.03] |
| Fruit & veg              | -0.01<br>[-0.03;0.02]         | 0.00<br>[-0.01;0.01]          | 0<br>[-0.03;0.02]             | -0.01<br>[-0.03;0]            | -0.02<br>[-0.04;0.01]         | 0.03<br>[0;0.06]              | <b>-0.07</b><br>[-0.09;-0.06] | <b>-0.08</b><br>[-0.11;-0.06] | <b>0.07</b><br>[0.03;0.12]    | <b>-0.10</b><br>[-0.14;-0.05] | -0.01<br>[-0.04;0.02]         | <b>-0.60</b><br>[-0.63;-0.57] | -0.06<br>[-0.13;0.01]         |
| Rest food & drink        | -0.01<br>[-0.04;0.01]         | 0<br>[-0.01;0.01]             | <b>-0.03</b><br>[-0.05;-0.01] | <b>0.04</b><br>[0.02;0.06]    | 0<br>[-0.01;0.02]             | <b>0.04</b><br>[0.01;0.06]    | <b>0.03</b><br>[0.02;0.04]    | 0<br>[-0.02;0.02]             | <b>-0.13</b><br>[-0.16;-0.03] | <b>-0.1</b><br>[-0.14;-0.06]  | -0.01<br>[-0.04;0.02]         | -0.03<br>[-0.06;0]            | <b>-0.66</b><br>[-0.71;-0.61] |

Notes: Elasticities in bold indicate those where 95% confidence intervals do not include zero. Columns indicate the group of price change and rows indicate the group of demand change. High-sugar soft drinks: >8g of sugar/100ml; medium-sugar soft drinks: 5-8g of sugar/100ml; low-sugar soft drinks: <5g of sugar/100ml; other soft drinks: water, fruit juice with no added sugars and milk-based drinks.

**Table 2. Price elasticities of demand in low-income (annual household income £<20,000) sample (n=223,174)**

|                          | High-sugar soft drinks        | Medium-sugar soft drinks      | Low-sugar soft drinks         | Other soft drinks             | Alcohol                       | Biscuits & cookies            | Chocolate & conf.             | Cake-type snacks              | Savoury snacks                | Meat & fish                   | Dairy & eggs                  | Fruit & vegetables            | Rest food & drink             |
|--------------------------|-------------------------------|-------------------------------|-------------------------------|-------------------------------|-------------------------------|-------------------------------|-------------------------------|-------------------------------|-------------------------------|-------------------------------|-------------------------------|-------------------------------|-------------------------------|
| High-sugar soft drinks   | <b>-0.84</b><br>[-1.00;-0.71] | -0.03<br>[-0.09;0.02]         | <b>-0.15</b><br>[-0.27;-0.01] | 0.00<br>[-0.11;0.12]          | <b>-0.25</b><br>[-0.36;-0.16] | 0.02<br>[-0.10;0.19]          | -0.06<br>[-0.11;0]            | -0.07<br>[-0.24;0.11]         | 0.17<br>[0;0.38]              | -0.02<br>[-0.28;0.21]         | <b>0.30</b><br>[0.15;0.44]    | -0.07<br>[-0.24;0.10]         | -0.08<br>[-0.43;0.23]         |
| Medium-sugar soft drinks | <b>-0.33</b><br>[-0.68;-0.02] | <b>-0.57</b><br>[-0.69;-0.44] | -0.05<br>[-0.38;0.26]         | <b>-0.31</b><br>[-0.62;-0.07] | -0.25<br>[-0.46;0]            | -0.08<br>[-0.49;0.29]         | -0.10<br>[-0.23;0.01]         | -0.17<br>[-0.64;0.22]         | -0.39<br>[-0.89;0.31]         | <b>0.98</b><br>[0.39;1.46]    | <b>-0.39</b><br>[-0.71;-0.03] | <b>0.43</b><br>[0.02;0.83]    | -0.06<br>[-0.87;0.73]         |
| Low-sugar soft drinks    | 0<br>[-0.10;0.09]             | -0.02<br>[-0.05;0.02]         | <b>-0.80</b><br>[-0.93;-0.70] | <b>-0.13</b><br>[-0.22;-0.05] | <b>-0.28</b><br>[-0.35;-0.21] | -0.01<br>[-0.13;0.10]         | <b>-0.07</b><br>[-0.10;-0.03] | -0.03<br>[-0.15;0.06]         | 0.05<br>[-0.18;0.17]          | 0.03<br>[-0.16;0.21]          | <b>0.14</b><br>[0.03;0.25]    | <b>0.21</b><br>[0.10;0.33]    | -0.14<br>[-0.44;0.06]         |
| Other soft drinks        | 0.08<br>[-0.04;0.23]          | -0.01<br>[-0.05;0.05]         | <b>0.12</b><br>[0.01;0.25]    | <b>-0.89</b><br>[-0.98;-0.80] | <b>-0.27</b><br>[-0.37;-0.17] | -0.08<br>[-0.22;0.08]         | -0.06<br>[-0.11;-0.02]        | 0<br>[-0.12;0.13]             | 0.09<br>[-0.08;0.27]          | <b>-0.27</b><br>[-0.51;-0.07] | <b>0.19</b><br>[0.05;0.32]    | <b>0.26</b><br>[0.11;0.38]    | -0.17<br>[-0.41;0.06]         |
| Alcohol                  | -0.01<br>[-0.12;0.09]         | -0.04<br>[-0.08;0]            | 0.01<br>[-0.06;0.11]          | -0.05<br>[-0.14;0.02]         | <b>-0.92</b><br>[-0.98;-0.85] | -0.04<br>[-0.15;0.06]         | 0.02<br>[-0.01;0.06]          | -0.04<br>[-0.13;0.06]         | <b>0.17</b><br>[0.05;0.33]    | 0.15<br>[-0.02;0.30]          | 0.12<br>[-0.01;0.21]          | -0.08<br>[-0.17;0.06]         | <b>-0.50</b><br>[-0.69;-0.28] |
| Biscuits & cookies       | 0.01<br>[-0.09;0.10]          | -0.03<br>[-0.06;0]            | 0.07<br>[0;0.16]              | 0.04<br>[-0.03;0.11]          | 0<br>[-0.06;0.06]             | <b>-0.74</b><br>[-0.85;-0.65] | <b>-0.13</b><br>[-0.17;-0.09] | -0.01<br>[-0.11;0.10]         | 0.12<br>[-0.02;0.26]          | -0.16<br>[-0.30;0]            | -0.03<br>[-0.12;0.07]         | 0.04<br>[-0.07;0.14]          | <b>-0.34</b><br>[-0.60;-0.18] |
| Chocolate & conf.        | 0.08<br>[-0.03;0.19]          | 0.01<br>[-0.03;0.04]          | <b>0.16</b><br>[0.04;0.25]    | 0.02<br>[-0.06;0.10]          | 0.07<br>[0;0.16]              | <b>-0.27</b><br>[-0.40;-0.15] | <b>-0.73</b><br>[-0.79;-0.67] | 0.02<br>[-0.09;0.15]          | <b>0.19</b><br>[0.02;0.35]    | <b>0.49</b><br>[0.31;0.67]    | <b>-0.29</b><br>[-0.42;-0.16] | <b>-0.35</b><br>[-0.46;-0.21] | <b>-0.74</b><br>[-1.00;-0.48] |
| Cake-type snacks         | -0.12<br>[-0.27;0.04]         | -0.04<br>[-0.10;0.02]         | <b>0.24</b><br>[0.09;0.39]    | <b>0.14</b><br>[0.03;0.27]    | -0.09<br>[-0.20;0.01]         | -0.19<br>[-0.35;0.02]         | <b>-0.15</b><br>[-0.23;-0.09] | <b>-0.71</b><br>[-0.85;-0.54] | <b>0.27</b><br>[0.06;0.47]    | <b>-0.38</b><br>[-0.68;-0.11] | 0.10<br>[-0.05;0.29]          | -0.07<br>[-0.23;0.11]         | <b>-0.44</b><br>[-0.83;-0.12] |
| Savoury snacks           | 0.02<br>[-0.07;0.09]          | 0.02<br>[-0.01;0.05]          | -0.02<br>[-0.10;0.06]         | 0.02<br>[-0.05;0.08]          | -0.03<br>[-0.10;0.02]         | -0.02<br>[-0.11;0.07]         | -0.03<br>[-0.08;0]            | -0.07<br>[-0.16;0]            | <b>-0.71</b><br>[-0.83;-0.59] | 0<br>[-0.14;0.12]             | -0.02<br>[-0.10;0.07]         | -0.02<br>[-0.10;0.07]         | <b>-0.27</b><br>[-0.48;-0.09] |
| Meat & fish              | 0.02<br>[-0.04;0.07]          | 0<br>[-0.02;0.02]             | -0.01<br>[-0.06;0.04]         | 0.03<br>[-0.02;0.07]          | <b>0.05</b><br>[0.01;0.09]    | <b>-0.07</b><br>[-0.13;-0.01] | 0.02<br>[0;0.05]              | -0.01<br>[-0.06;0.06]         | 0.01<br>[-0.06;0.10]          | <b>-0.80</b><br>[-0.90;-0.70] | <b>-0.15</b><br>[-0.21;-0.08] | <b>-0.11</b><br>[-0.17;-0.04] | -0.10<br>[-0.22;0.02]         |
| Dairy & eggs             | 0.02<br>[-0.01;0.06]          | -0.01<br>[-0.02;0.01]         | -0.01<br>[-0.05;0.03]         | 0.03<br>[0;0.07]              | 0.02<br>[-0.01;0.05]          | 0.02<br>[-0.02;0.07]          | -0.02<br>[-0.04;0.01]         | 0.01<br>[-0.03;0.06]          | -0.05<br>[-0.10;0.02]         | -0.07<br>[-0.13;0]            | <b>-0.86</b><br>[-0.90;-0.81] | <b>-0.12</b><br>[-0.17;-0.08] | -0.05<br>[-0.15;0.05]         |
| Fruit & veg              | -0.03<br>[-0.08;0.01]         | 0<br>[-0.02;0.02]             | 0.02<br>[-0.02;0.07]          | -0.03<br>[-0.06;0.01]         | -0.02<br>[-0.06;0.02]         | 0.01<br>[-0.04;0.07]          | <b>-0.09</b><br>[-0.12;-0.07] | <b>-0.08</b><br>[-0.13;-0.04] | <b>0.13</b><br>[0.05;0.20]    | -0.08<br>[-0.16;0]            | -0.03<br>[-0.09;0.02]         | <b>-0.58</b><br>[-0.64;-0.53] | <b>-0.15</b><br>[-0.26;-0.04] |
| Rest food & drink        | -0.01<br>[-0.04;0.04]         | 0.01<br>[-0.01;0.02]          | <b>-0.05</b><br>[-0.1;-0.01]  | 0.01<br>[-0.02;0.05]          | 0.02<br>[0;0.05]              | <b>0.06</b><br>[0.01;0.10]    | <b>0.03</b><br>[0.01;0.05]    | <b>0.05</b><br>[0.01;0.09]    | -0.18<br>[-0.24;0]            | <b>-0.12</b><br>[-0.18;-0.06] | -0.04<br>[-0.08;0.01]         | -0.03<br>[-0.08;0.01]         | <b>-0.57</b><br>[-0.66;-0.48] |

Notes: Elasticities in bold indicate those where 95% confidence intervals do not include zero. Columns indicate the group of price change and rows indicate the group of demand change. High-sugar soft drinks: >8g of sugar/100ml; medium-sugar soft drinks: 5-8g of sugar/100ml; low-sugar soft drinks: <5g of sugar/100ml; other soft drinks: water, fruit juice with no added sugars and milk-based drinks.

**Table 3. Price elasticities of demand in mid-income (annual household income £20,000-£49,000) sample (n=305,841)**

|                          | High-sugar soft drinks        | Medium-sugar soft drinks      | Low-sugar soft drinks         | Other soft drinks             | Alcohol                       | Biscuits & cookies            | Chocolate & conf.             | Cake-type snacks              | Savoury snacks                | Meat & fish                   | Dairy & eggs                  | Fruit & vegetables            | Rest food & drink             |
|--------------------------|-------------------------------|-------------------------------|-------------------------------|-------------------------------|-------------------------------|-------------------------------|-------------------------------|-------------------------------|-------------------------------|-------------------------------|-------------------------------|-------------------------------|-------------------------------|
| High-sugar soft drinks   | <b>-0.75</b><br>[-0.85;-0.64] | <b>-0.04</b><br>[-0.09;-0.01] | -0.06<br>[-0.16;0.04]         | -0.07<br>[-0.17;0.02]         | <b>-0.15</b><br>[-0.22;-0.06] | 0.05<br>[-0.07;0.18]          | <b>-0.07</b><br>[-0.11;-0.02] | -0.02<br>[-0.14;0.11]         | <b>0.27</b><br>[0.10;0.42]    | <b>-0.36</b><br>[-0.53;-0.17] | <b>0.20</b><br>[0.08;0.33]    | -0.10<br>[-0.22;0.03]         | 0.01<br>[-0.27;0.22]          |
| Medium-sugar soft drinks | -0.20<br>[-0.43;0.05]         | <b>-0.67</b><br>[-0.78;-0.57] | <b>-0.51</b><br>[-0.74;-0.23] | <b>-0.36</b><br>[-0.60;-0.15] | -0.12<br>[-0.30;0.13]         | -0.06<br>[-0.40;0.27]         | <b>-0.10</b><br>[-0.20;-0.01] | 0.00<br>[-0.27;0.27]          | <b>-0.48</b><br>[-0.94;-0.11] | <b>1.24</b><br>[0.72;1.69]    | -0.19<br>[-0.44;0.08]         | <b>0.41</b><br>[0.10;0.76]    | -0.06<br>[-0.77;0.55]         |
| Low-sugar soft drinks    | -0.01<br>[-0.08;0.06]         | <b>-0.05</b><br>[-0.08;-0.02] | <b>-0.85</b><br>[-0.92;-0.77] | <b>-0.09</b><br>[-0.14;-0.02] | <b>-0.23</b><br>[-0.28;-0.18] | -0.01<br>[-0.09;0.07]         | <b>-0.07</b><br>[-0.12;-0.04] | 0.00<br>[-0.08;0.10]          | -0.07<br>[-0.20;0.04]         | <b>0.13</b><br>[0.01;0.25]    | <b>0.16</b><br>[0.08;0.26]    | 0.07<br>[-0.02;0.15]          | -0.01<br>[-0.14;0.17]         |
| Other soft drinks        | <b>0.11</b><br>[0.03;0.22]    | <b>-0.06</b><br>[-0.10;-0.03] | 0.02<br>[-0.07;0.12]          | <b>-0.79</b><br>[-0.87;-0.73] | <b>-0.13</b><br>[-0.19;-0.07] | 0.03<br>[-0.08;0.14]          | <b>-0.07</b><br>[-0.11;-0.04] | -0.01<br>[-0.11;0.09]         | 0.03<br>[-0.10;0.18]          | -0.13<br>[-0.25;0.06]         | 0.13<br>[0;0.22]              | -0.04<br>[-0.14;0.06]         | -0.02<br>[-0.23;0.20]         |
| Alcohol                  | -0.04<br>[-0.12;0.03]         | -0.02<br>[-0.05;0]            | 0.01<br>[-0.05;0.09]          | <b>-0.13</b><br>[-0.20;-0.08] | <b>-0.91</b><br>[-0.95;-0.85] | -0.05<br>[-0.15;0.03]         | 0.03<br>[0;0.05]              | <b>0.13</b><br>[0.05;0.21]    | <b>0.13</b><br>[0.01;0.23]    | 0.04<br>[-0.08;0.17]          | -0.04<br>[-0.11;0.04]         | <b>-0.10</b><br>[-0.18;-0.02] | <b>-0.29</b><br>[-0.46;-0.14] |
| Biscuits & cookies       | -0.01<br>[-0.08;0.07]         | 0<br>[-0.02;0.03]             | <b>0.18</b><br>[0.11;0.25]    | 0.05<br>[0;0.11]              | <b>0.09</b><br>[0.02;0.13]    | <b>-0.67</b><br>[-0.75;-0.58] | <b>-0.11</b><br>[-0.15;-0.08] | <b>-0.11</b><br>[-0.18;-0.05] | <b>0.14</b><br>[0.03;0.24]    | <b>-0.19</b><br>[-0.33;-0.08] | -0.06<br>[-0.16;0.01]         | -0.01<br>[-0.09;0.08]         | <b>-0.45</b><br>[-0.62;-0.29] |
| Chocolate & conf.        | 0.06<br>[-0.05;0.17]          | 0.01<br>[-0.02;0.04]          | <b>0.21</b><br>[0.12;0.32]    | 0.02<br>[-0.07;0.09]          | 0.07<br>[0;0.14]              | -0.07<br>[-0.18;0.03]         | <b>-0.74</b><br>[-0.79;-0.69] | 0.07<br>[-0.02;0.19]          | <b>0.27</b><br>[0.12;0.42]    | <b>0.41</b><br>[0.24;0.58]    | <b>-0.30</b><br>[-0.42;-0.19] | <b>-0.20</b><br>[-0.31;-0.09] | <b>-1.03</b><br>[-1.32;-0.81] |
| Cake-type snacks         | 0.12<br>[-0.01;0.26]          | 0.05<br>[0;0.09]              | <b>0.15</b><br>[0.03;0.26]    | 0.06<br>[-0.05;0.17]          | 0.01<br>[-0.09;0.09]          | <b>-0.26</b><br>[-0.47;-0.13] | <b>-0.16</b><br>[-0.22;-0.11] | <b>-0.65</b><br>[-0.78;-0.49] | <b>0.25</b><br>[0.08;0.45]    | <b>-0.24</b><br>[-0.42;-0.04] | -0.02<br>[-0.17;0.11]         | <b>-0.16</b><br>[-0.31;-0.01] | <b>-0.55</b><br>[-0.82;-0.23] |
| Savoury snacks           | -0.02<br>[-0.08;0.03]         | 0.01<br>[-0.01;0.04]          | 0.03<br>[-0.04;0.08]          | <b>-0.06</b><br>[-0.11;-0.01] | -0.02<br>[-0.08;0.02]         | -0.01<br>[-0.10;0.05]         | -0.02<br>[-0.05;0.02]         | -0.02<br>[-0.11;0.04]         | <b>-0.75</b><br>[-0.84;-0.65] | -0.05<br>[-0.16;0.05]         | -0.01<br>[-0.09;0.07]         | -0.01<br>[-0.09;0.07]         | <b>-0.23</b><br>[-0.35;-0.10] |
| Meat & fish              | -0.01<br>[-0.05;0.03]         | 0.01<br>[0;0.03]              | 0.03<br>[-0.02;0.07]          | 0.01<br>[-0.03;0.04]          | 0.03<br>[0;0.06]              | -0.05<br>[-0.10;0]            | 0<br>[-0.02;0.02]             | <b>-0.05</b><br>[-0.11;-0.01] | -0.06<br>[-0.14;0]            | <b>-0.75</b><br>[-0.81;-0.67] | <b>-0.12</b><br>[-0.17;-0.07] | <b>-0.08</b><br>[-0.13;-0.02] | 0.04<br>[-0.05;0.14]          |
| Dairy & eggs             | 0.03<br>[-0.01;0.06]          | -0.01<br>[-0.02;0]            | 0.03<br>[-0.01;0.07]          | <b>0.04</b><br>[0.01;0.06]    | 0<br>[-0.02;0.03]             | 0.03<br>[-0.01;0.07]          | -0.01<br>[-0.03;0.01]         | -0.03<br>[-0.07;0.01]         | -0.02<br>[-0.09;0.03]         | -0.01<br>[-0.07;0.04]         | <b>-0.89</b><br>[-0.94;-0.84] | <b>-0.13</b><br>[-0.16;-0.08] | <b>-0.09</b><br>[-0.19;-0.01] |
| Fruit & veg              | 0.01<br>[-0.02;0.05]          | 0.01<br>[0;0.02]              | -0.02<br>[-0.05;0.02]         | -0.03<br>[-0.05;0]            | 0<br>[-0.03;0.02]             | 0.02<br>[-0.02;0.06]          | <b>-0.06</b><br>[-0.08;-0.04] | <b>-0.08</b><br>[-0.12;-0.05] | 0.05<br>[0;0.11]              | <b>-0.12</b><br>[-0.18;-0.05] | 0.02<br>[-0.02;0.06]          | <b>-0.58</b><br>[-0.62;-0.54] | -0.04<br>[-0.12;0.04]         |
| Rest food & drink        | 0<br>[-0.05;0.05]             | 0<br>[-0.01;0.02]             | <b>-0.05</b><br>[-0.09;-0.03] | <b>0.05</b><br>[0.03;0.08]    | -0.02<br>[-0.04;0.01]         | 0.01<br>[-0.03;0.05]          | <b>0.03</b><br>[0.01;0.04]    | 0<br>[-0.04;0.03]             | <b>-0.11</b><br>[-0.15;-0.03] | <b>-0.09</b><br>[-0.14;-0.04] | 0.02<br>[-0.01;0.06]          | -0.02<br>[-0.05;0.01]         | <b>-0.7</b><br>[-0.76;-0.63]  |

Notes: Elasticities in bold indicate those where 95% confidence intervals do not include zero. Columns indicate the group of price change and rows indicate the group of demand change. High-sugar soft drinks: >8g of sugar/100ml; medium-sugar soft drinks: 5-8g of sugar/100ml; low-sugar soft drinks: <5g of sugar/100ml; other soft drinks: water, fruit juice with no added sugars and milk-based drinks.

**Table 4. Price elasticities of demand in high-income (annual household income > £50,000) sample (n=94,444)**

|                          | High-sugar soft drinks        | Medium-sugar soft drinks      | Low-sugar soft drinks         | Other soft drinks             | Alcohol                       | Biscuits & cookies            | Chocolate & conf.             | Cake-type snacks              | Savoury snacks                | Meat & fish                   | Dairy & eggs                  | Fruit & veg                   | Rest food & drink             |
|--------------------------|-------------------------------|-------------------------------|-------------------------------|-------------------------------|-------------------------------|-------------------------------|-------------------------------|-------------------------------|-------------------------------|-------------------------------|-------------------------------|-------------------------------|-------------------------------|
| High-sugar soft drinks   | <b>-0.60</b><br>[-0.76;-0.39] | -0.02<br>[-0.10;0.05]         | <b>-0.26</b><br>[-0.46;-0.06] | -0.03<br>[-0.19;0.12]         | <b>-0.18</b><br>[-0.30;-0.04] | 0.03<br>[-0.18;0.33]          | <b>-0.08</b><br>[-0.14;-0.01] | 0.06<br>[-0.15;0.27]          | <b>0.32</b><br>[0.03;0.58]    | <b>-0.73</b><br>[-1.05;-0.34] | <b>0.31</b><br>[0.14;0.55]    | -0.05<br>[-0.27;0.16]         | 0.19<br>[-0.34;0.60]          |
| Medium-sugar soft drinks | -0.19<br>[-0.63;0.40]         | <b>-0.57</b><br>[-0.72;-0.34] | 0.01<br>[-0.42;0.46]          | <b>-0.39</b><br>[-0.76;-0.02] | -0.26<br>[-0.66;0.03]         | <b>-0.75</b><br>[-1.23;-0.13] | 0.01<br>[-0.15;0.17]          | -0.16<br>[-0.65;0.34]         | -0.08<br>[-0.75;0.59]         | <b>0.90</b><br>[0.24;1.70]    | 0.29<br>[-0.14;0.88]          | 0.12<br>[-0.43;0.72]          | 0.09<br>[-1.19;0.91]          |
| Low-sugar soft drinks    | -0.01<br>[-0.13;0.11]         | -0.01<br>[-0.07;0.03]         | <b>-0.78</b><br>[-0.94;-0.64] | <b>-0.23</b><br>[-0.33;-0.11] | <b>-0.22</b><br>[-0.29;-0.11] | -0.06<br>[-0.21;0.07]         | <b>-0.05</b><br>[-0.11;-0.01] | 0.07<br>[-0.07;0.22]          | 0.05<br>[-0.15;0.23]          | -0.15<br>[-0.43;0.07]         | 0.13<br>[-0.02;0.27]          | <b>0.16</b><br>[0.02;0.30]    | 0.14<br>[-0.15;0.41]          |
| Other soft drinks        | <b>0.13</b><br>[0.02;0.28]    | <b>-0.06</b><br>[-0.11;-0.02] | -0.13<br>[-0.28;0.02]         | <b>-0.83</b><br>[-0.96;-0.71] | -0.09<br>[-0.20;0.01]         | -0.02<br>[-0.17;0.15]         | <b>-0.13</b><br>[-0.21;-0.07] | 0.09<br>[-0.05;0.25]          | 0.12<br>[-0.08;0.36]          | -0.19<br>[-0.45;0.08]         | 0.01<br>[-0.14;0.18]          | -0.11<br>[-0.27;0.11]         | 0.29<br>[-0.04;0.58]          |
| Alcohol                  | -0.10<br>[-0.21;0.05]         | -0.04<br>[-0.09;0]            | -0.07<br>[-0.21;0.07]         | -0.08<br>[-0.19;0.01]         | <b>-0.82</b><br>[-0.93;-0.74] | -0.12<br>[-0.29;0.03]         | 0.04<br>[0;0.09]              | 0.11<br>[-0.05;0.25]          | 0.01<br>[-0.18;0.22]          | 0.11<br>[-0.10;0.30]          | 0.00<br>[-0.15;0.15]          | -0.01<br>[-0.17;0.12]         | -0.33<br>[-0.61;0]            |
| Biscuits & cookies       | 0<br>[-0.14;0.12]             | 0.02<br>[-0.02;0.06]          | <b>0.15</b><br>[0.03;0.28]    | 0.06<br>[-0.05;0.17]          | 0.06<br>[-0.03;0.15]          | <b>-0.64</b><br>[-0.78;-0.50] | <b>-0.11</b><br>[-0.16;-0.04] | -0.07<br>[-0.23;0.07]         | 0.13<br>[-0.09;0.31]          | <b>-0.19</b><br>[-0.43;-0.01] | 0.02<br>[-0.10;0.20]          | -0.12<br>[-0.26;0.08]         | -0.35<br>[-0.62;0.01]         |
| Chocolate & conf.        | <b>0.19</b><br>[0.01;0.36]    | 0.05<br>[-0.02;0.13]          | -0.01<br>[-0.19;0.23]         | -0.01<br>[-0.15;0.15]         | 0.13<br>[0;0.27]              | -0.18<br>[-0.39;0.01]         | <b>-0.75</b><br>[-0.85;-0.66] | <b>0.27</b><br>[0.06;0.42]    | <b>0.49</b><br>[0.24;0.72]    | <b>0.41</b><br>[0.11;0.73]    | <b>-0.30</b><br>[-0.48;-0.08] | <b>-0.22</b><br>[-0.44;-0.03] | <b>-1.10</b><br>[-1.44;-0.72] |
| Cake-type snacks         | <b>-0.22</b><br>[-0.50;-0.01] | -0.08<br>[-0.16;0.02]         | 0.12<br>[-0.08;0.37]          | -0.02<br>[-0.19;0.18]         | 0.12<br>[-0.05;0.30]          | -0.25<br>[-0.52;0.02]         | <b>-0.14</b><br>[-0.23;-0.04] | <b>-0.53</b><br>[-0.74;-0.25] | <b>0.70</b><br>[0.30;1.03]    | -0.24<br>[-0.63;0.20]         | 0.25<br>[-0.06;0.51]          | 0.04<br>[-0.23;0.32]          | <b>-1.18</b><br>[-1.71;-0.60] |
| Savoury snacks           | 0.03<br>[-0.07;0.16]          | 0.01<br>[-0.04;0.04]          | -0.03<br>[-0.15;0.06]         | -0.07<br>[-0.15;0.04]         | -0.03<br>[-0.11;0.05]         | -0.04<br>[-0.17;0.09]         | <b>-0.07</b><br>[-0.13;-0.01] | -0.05<br>[-0.15;0.07]         | <b>-0.83</b><br>[-0.98;-0.68] | -0.05<br>[-0.25;0.15]         | 0.08<br>[-0.06;0.21]          | 0.07<br>[-0.06;0.21]          | -0.14<br>[-0.36;0.11]         |
| Meat & fish              | -0.01<br>[-0.10;0.06]         | 0<br>[-0.03;0.02]             | 0.01<br>[-0.07;0.09]          | 0<br>[-0.07;0.05]             | -0.01<br>[-0.07;0.04]         | 0<br>[-0.07;0.08]             | -0.01<br>[-0.04;0.03]         | 0.01<br>[-0.08;0.07]          | -0.11<br>[-0.24;0.01]         | <b>-0.70</b><br>[-0.81;-0.57] | -0.06<br>[-0.14;0.03]         | -0.04<br>[-0.12;0.05]         | -0.02<br>[-0.17;0.14]         |
| Dairy & eggs             | 0.02<br>[-0.05;0.07]          | 0<br>[-0.02;0.02]             | 0.01<br>[-0.04;0.06]          | 0.04<br>[-0.01;0.10]          | -0.02<br>[-0.06;0.03]         | -0.01<br>[-0.07;0.06]         | -0.03<br>[-0.06;0]            | 0<br>[-0.05;0.08]             | -0.02<br>[-0.12;0.08]         | 0.02<br>[-0.06;0.12]          | <b>-0.93</b><br>[-1.01;-0.86] | <b>-0.09</b><br>[-0.17;-0.03] | <b>-0.23</b><br>[-0.39;-0.06] |
| Fruit & veg              | 0<br>[-0.06;0.07]             | -0.02<br>[-0.04;0]            | 0.01<br>[-0.06;0.07]          | 0.04<br>[-0.01;0.09]          | -0.03<br>[-0.07;0.01]         | <b>0.09</b><br>[0.02;0.15]    | <b>-0.06</b><br>[-0.10;-0.03] | <b>-0.08</b><br>[-0.15;-0.01] | 0.03<br>[-0.06;0.12]          | -0.08<br>[-0.19;0.03]         | -0.03<br>[-0.11;0.06]         | <b>-0.69</b><br>[-0.75;-0.58] | 0.07<br>[-0.12;0.21]          |
| Rest food & drink        | -0.02<br>[-0.05;0.09]         | 0.01<br>[-0.01;0.03]          | 0.01<br>[-0.04;0.07]          | 0.03<br>[-0.01;0.07]          | -0.01<br>[-0.05;0.02]         | 0.05<br>[-0.02;0.11]          | 0.04<br>[0;0.06]              | <b>-0.06</b><br>[-0.12;-0.01] | <b>-0.1</b><br>[-0.18;-0.01]  | <b>-0.1</b><br>[-0.19;-0.01]  | -0.02<br>[-0.08;0.05]         | -0.06<br>[-0.13;0]            | <b>-0.7</b><br>[-0.83;-0.58]  |

Notes: Elasticities in bold indicate those where 95% confidence intervals do not include zero. Columns indicate the group of price change and rows indicate the group of demand change. High-sugar soft drinks: >8g of sugar/100ml; medium-sugar soft drinks: 5-8g of sugar/100ml; low-sugar soft drinks: <5g of sugar/100ml; other soft drinks: water, fruit juice with no added sugars and milk-based drinks.
